# Supplementary material for: Integrated exome and RNA sequencing of dedifferentiated liposarcoma
Source: PubMed Central journal article supplement (PMC6908635; doi:10.1038/s41467-019-13286-z), 2019-12-12
Supplement: 41467_2019_13286_MOESM1_ESM.pdf [file 41467_2019_13286_MOESM1_ESM.pdf]

Supplementary Information

## Integrated Exome and RNA Sequencing of Dedifferentiated Liposarcoma

Hirata et al.

## Supplementary Figure 1

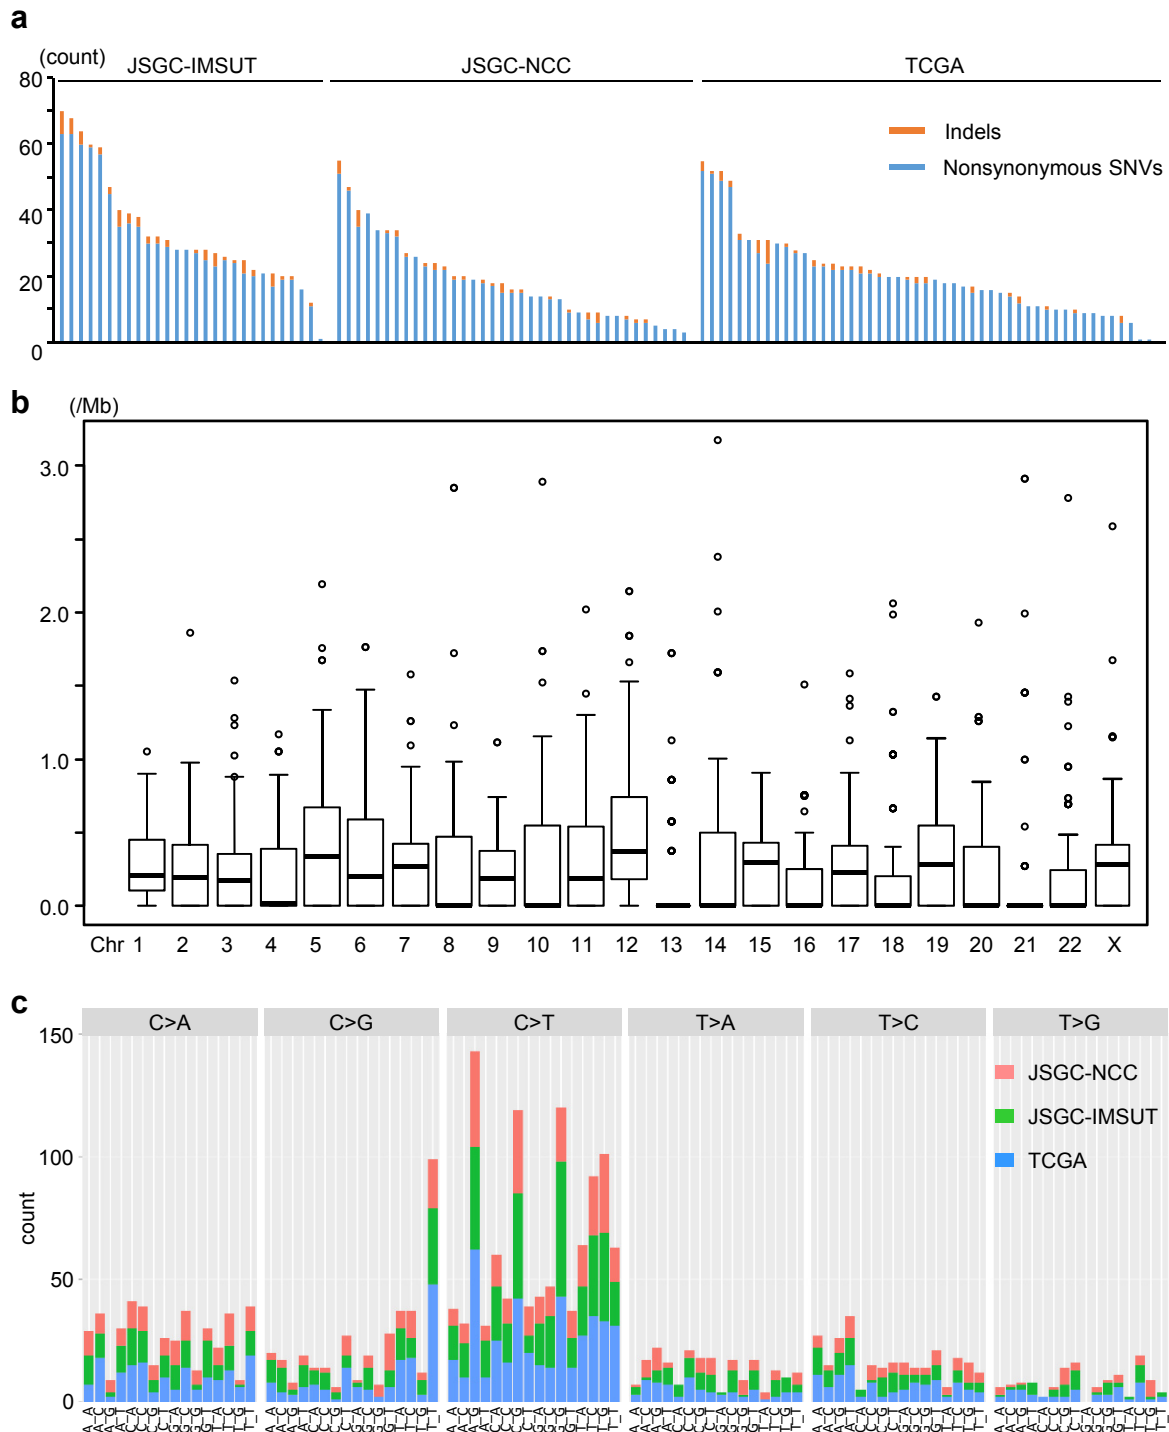

**Supplementary Figure. 1** Somatic mutation profiles among three cohorts. **a** Frequencies of nonsynonymous SNVs and short Indels for each sample among three cohorts. Light blue and orange bars represent frequency of SNVs and Indels, respectively. **b** Nonsynonymous tumor mutation burden at each chromosome. The box signifies the upper and lower quartiles; the center bold line within the box, median; the upper and lower whiskers, upper and lower quartiles +/- interquartile ranges, respectively. **c** 96 substitution classification for DDLPS samples in the three cohorts. SNVs were classified by six base substitution patterns: C>A, C>G, C>T, T>A, T>C, T>G and by information on the bases immediately 5' and 3' to each mutated base.

## Supplementary Figure 2

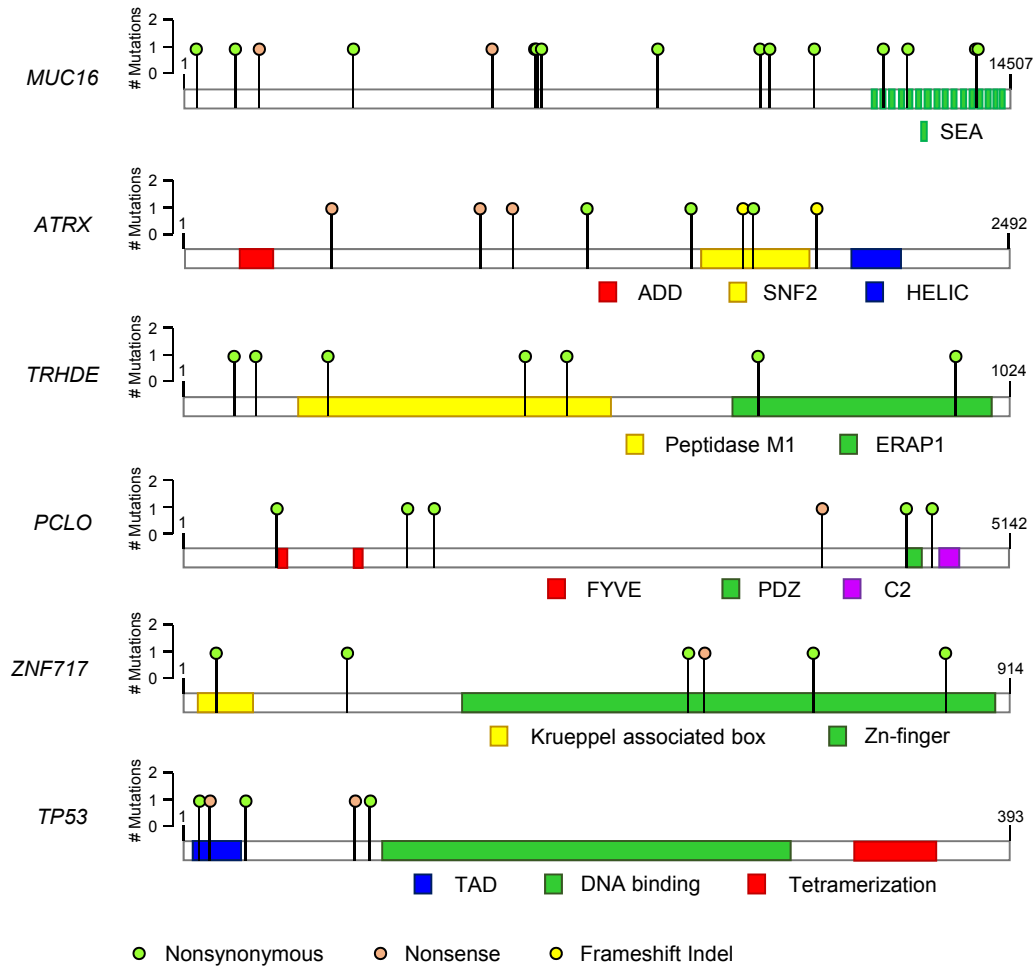

**Supplementary Figure 2.** Distribution of the somatic mutations identified in DDLPS. Distribution of the somatic mutations in *MUC16*, *ATRX*, *TRHDE*, *PCLO*, *TP53*, and *ZNF717*, which were identified in more than 5 samples of DDLPS. Lower box represents functional domains in each gene; vertical bars, mutation loci; circles, type of mutations.

### Supplementary Figure 3

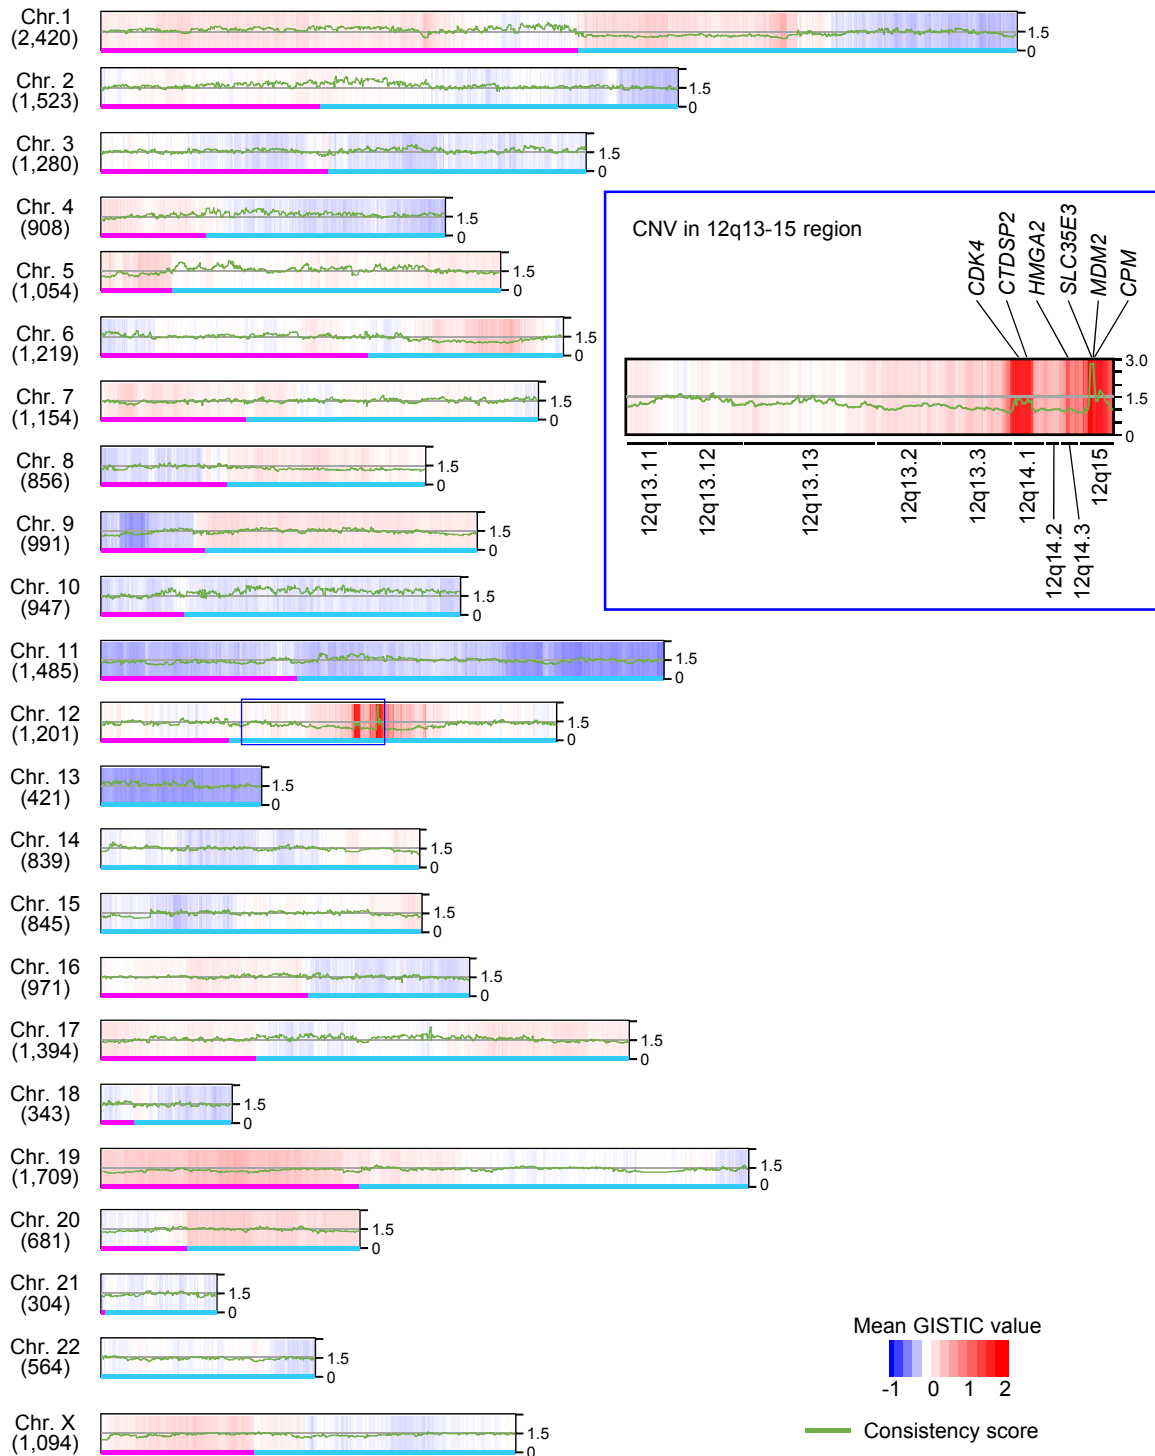

**Supplementary Figure 3.** Genome-wide SCNA pattern in DDLPS. Vertical heat-colored lines represent mean GISTIC value of each gene from 115 DDLPS samples. Numbers in the parentheses describes sum of the genes at each chromosome, subjected in this study (23,109 genes in total). Consistency score (green line) was produced by calculating inverse number of standard deviation of GISTIC value for each gene. Pink and blue bars indicate the short and long arms of each chromosome, respectively.

**a**

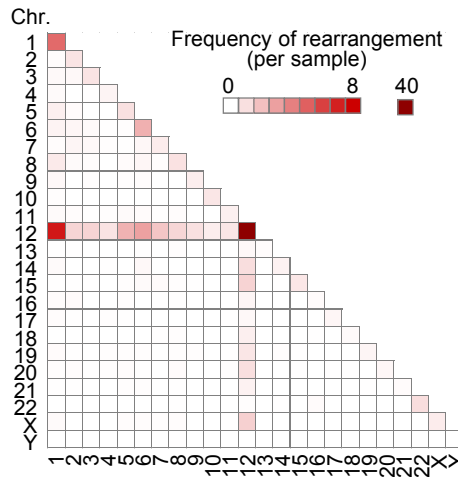

**b**

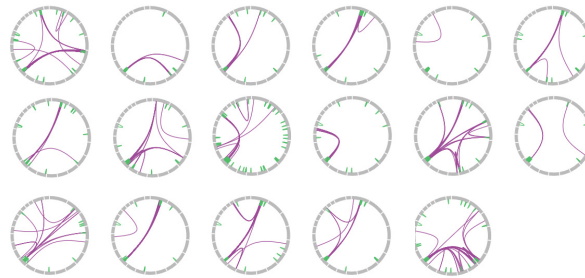

**Supplementary Figure 4.** Frequency of chromosomal rearrangements of DDLPS and WDLPS. **a** Frequency of inter- and intra-chromosomal rearrangements. Each box in the heatmap shows the mean frequency of inter- or intra- chromosomal rearrangement. The frequency of chromosomal rearrangements in each sample was determined using Genomon Fusion to analysis RNA sequencing results from 101 DDLPS tumors. **b**, Chromosomal rearrangements of 17 WDLPS samples. Circos plots represent the inter- (purple) and intra-(green) chromosomal rearrangements.

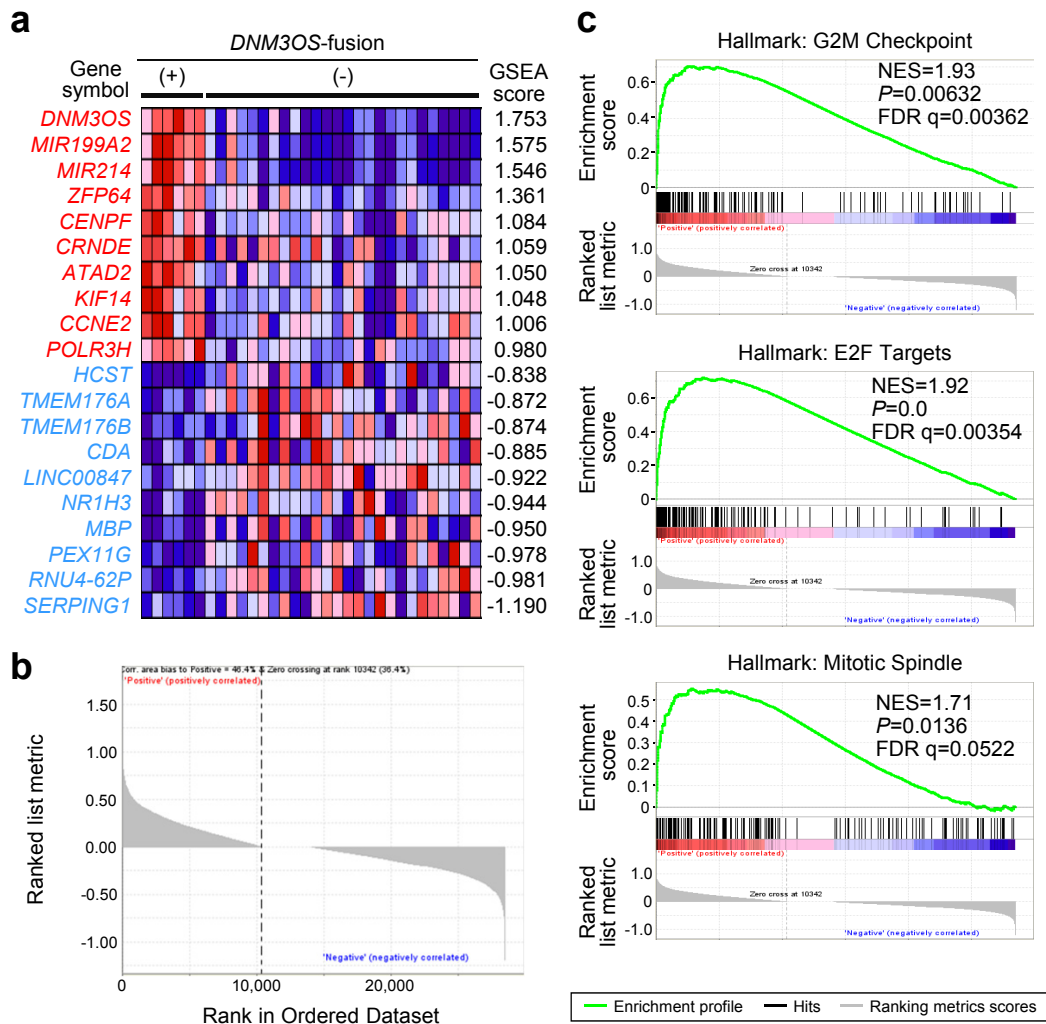

**Supplementary Figure 5.** Gene-set enrichment analysis (GSEA) between *DNM3OS*-fusion positive and negative DDLPS. **a** Heat map and gene list with the highest and lowest GSEA score in fusion positive DDLPS. Expression profiles were compared between *DNM3OS*-fusion positive (+) and negative (-) DDLPS from JSGC-NCC by GSEA. Genes with the 10 highest and lowest GSEA scores were listed. **b** Ranked list correlations between DDLPS with and without *DNM3OS*-fusion genes. GSEA ranking metrics scores of 28,449 genes were aligned in descending order. **c** Enrichment plots for gene sets enriched in *DNM3OS*-fusion positive DDLPS. Enrichment plots were depicted for gene sets with significant *P*-value (<0.05) and FDR *q*-value (<0.1) by GSEA analysis. GSEA analysis was conducted with Hallmark database by using RNA sequencing results from 32 (6 positive and 26 negative) JSGC-NCC samples.

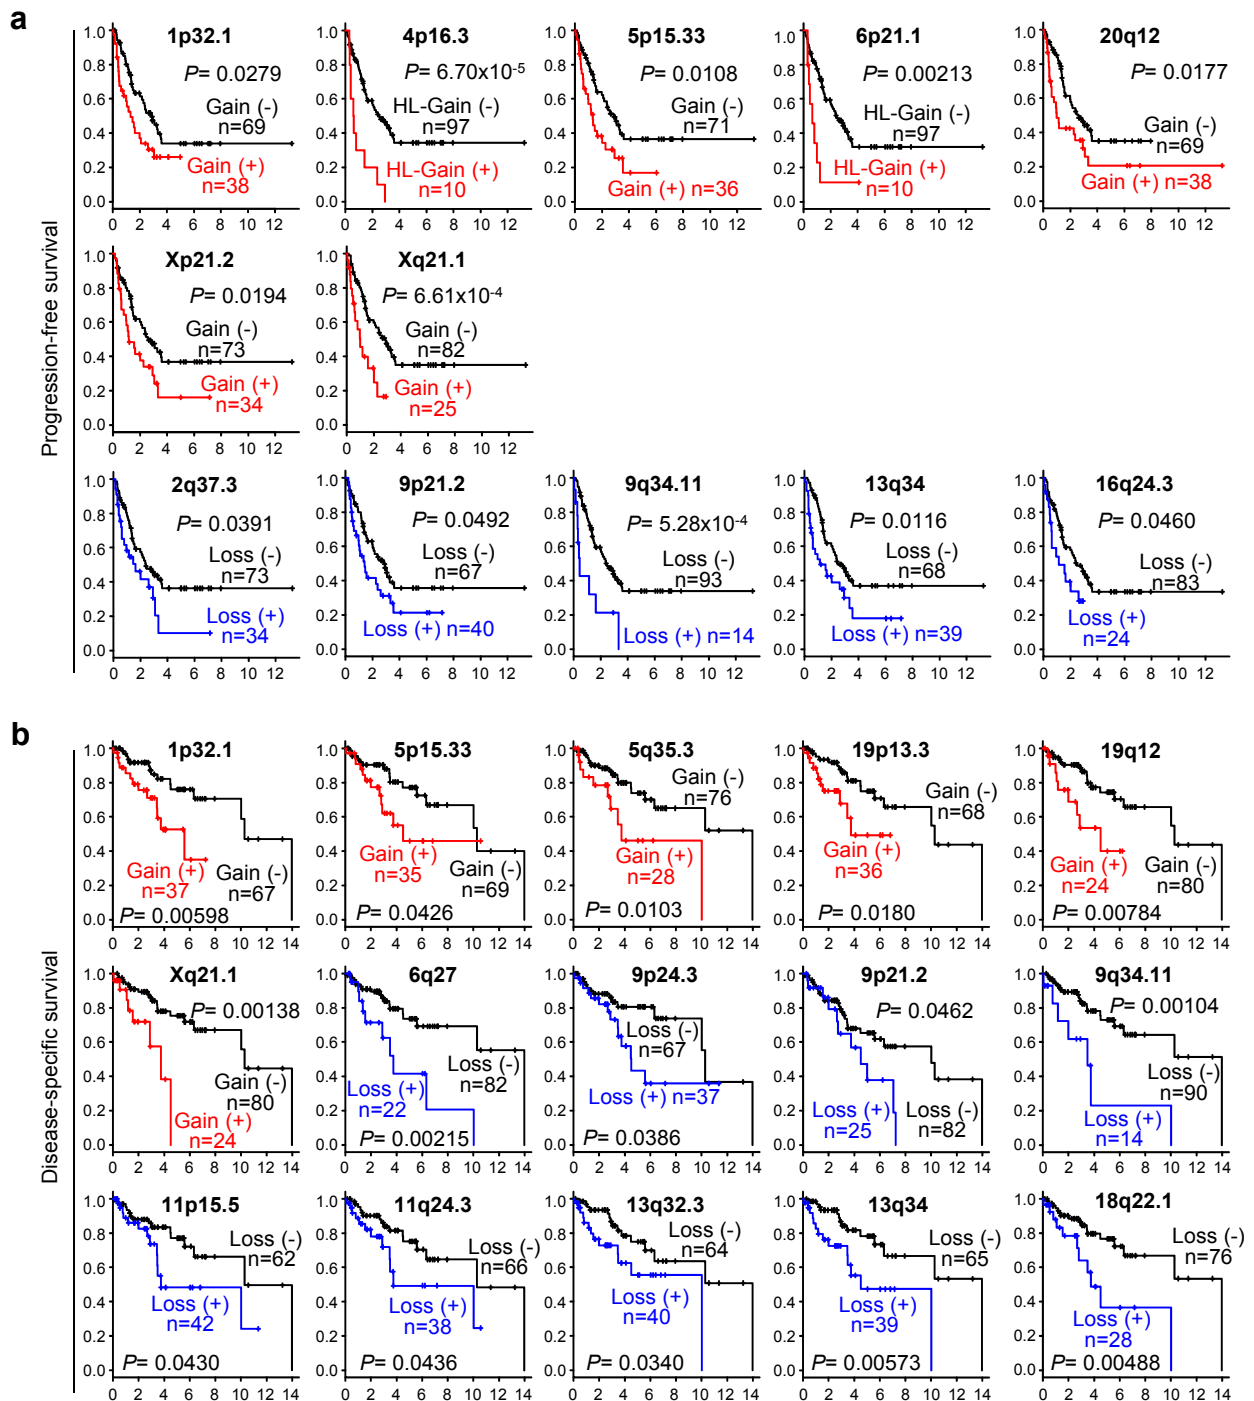

**Supplementary Figure 6.** Somatic copy number alterations (SCNAs) associated with progression-free and disease-specific survival. **a** Progression-free survivals by the status of 12 chromosome regions with gain and loss. **b** Disease-specific survivals by the status of 15 chromosome regions with gain and loss. Kaplan-Meier survival analysis was performed after stratifying patients with DDLPS by the status of recurrent SCNAs. SCNAs with gain were stratified by two criteria: high-level gain (HL-Gain) vs no HL-Gain (low-level or no gain), and Gain (high- or low-level gain) vs no Gain. *P*-value for each analysis was produced by log-rank test.

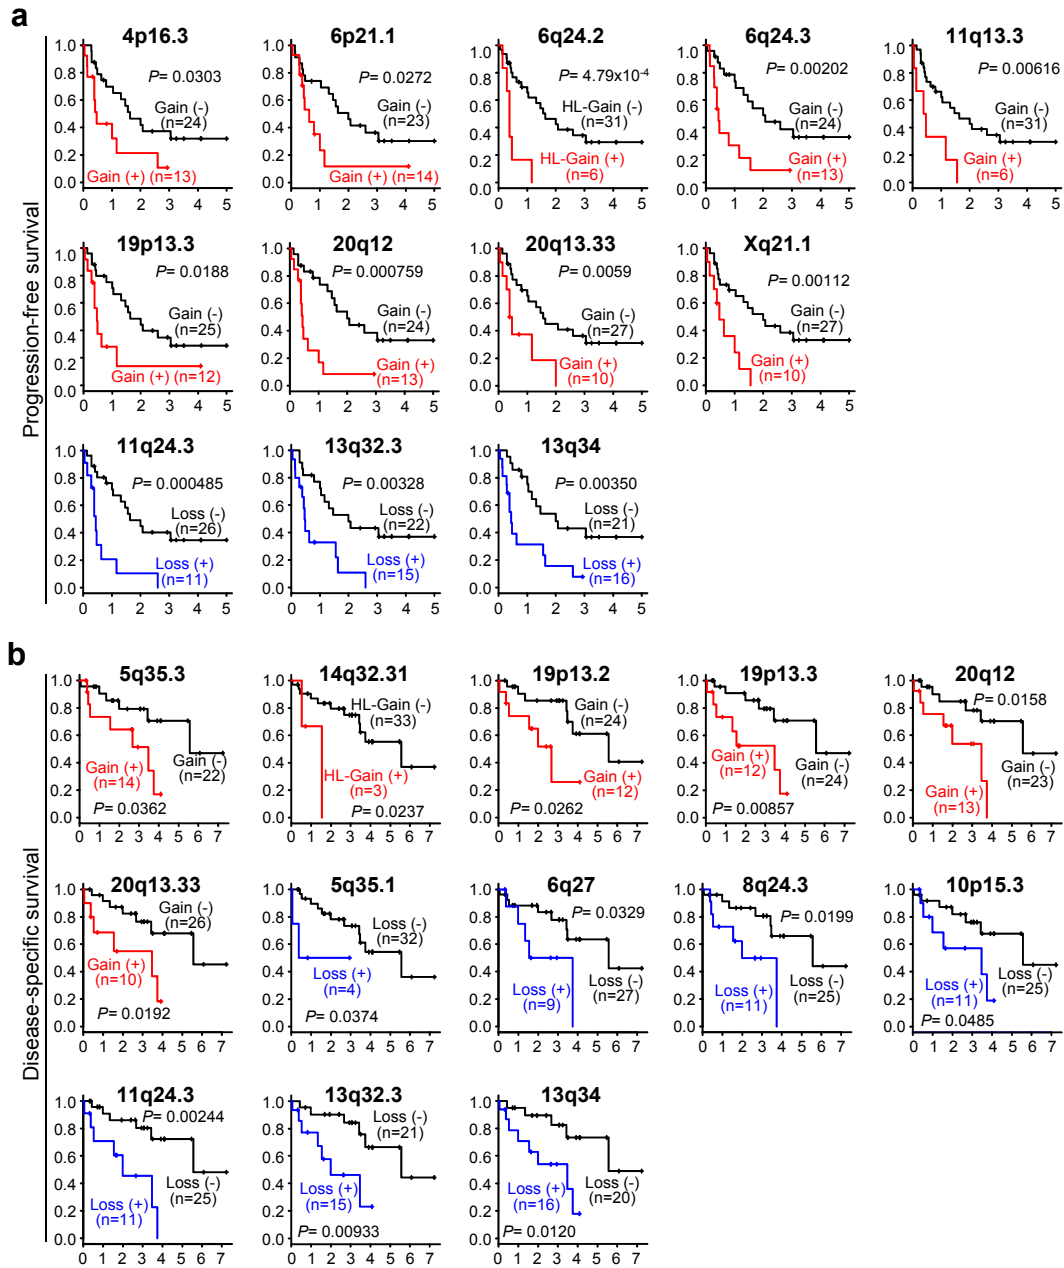

**Supplementary Figure 7.** Association of additional SCNA regions with progression-free (a) and disease-specific (b) survival for Cluster 1 DDLPS. Kaplan-Meier survival analysis was performed after stratifying the patients with Cluster 1 DDLPS by the status of recurrent SCNAs. Progression-free and disease-specific survival curves were analyzed by Kaplan-Meier methods. SCNAs with gain were stratified by two criteria: high-level gain (HL-Gain) vs no HL-Gain (low-level or no gain), and Gain (high- or low-level gain) vs no Gain. *P*-value for each analysis was produced by log-rank test.



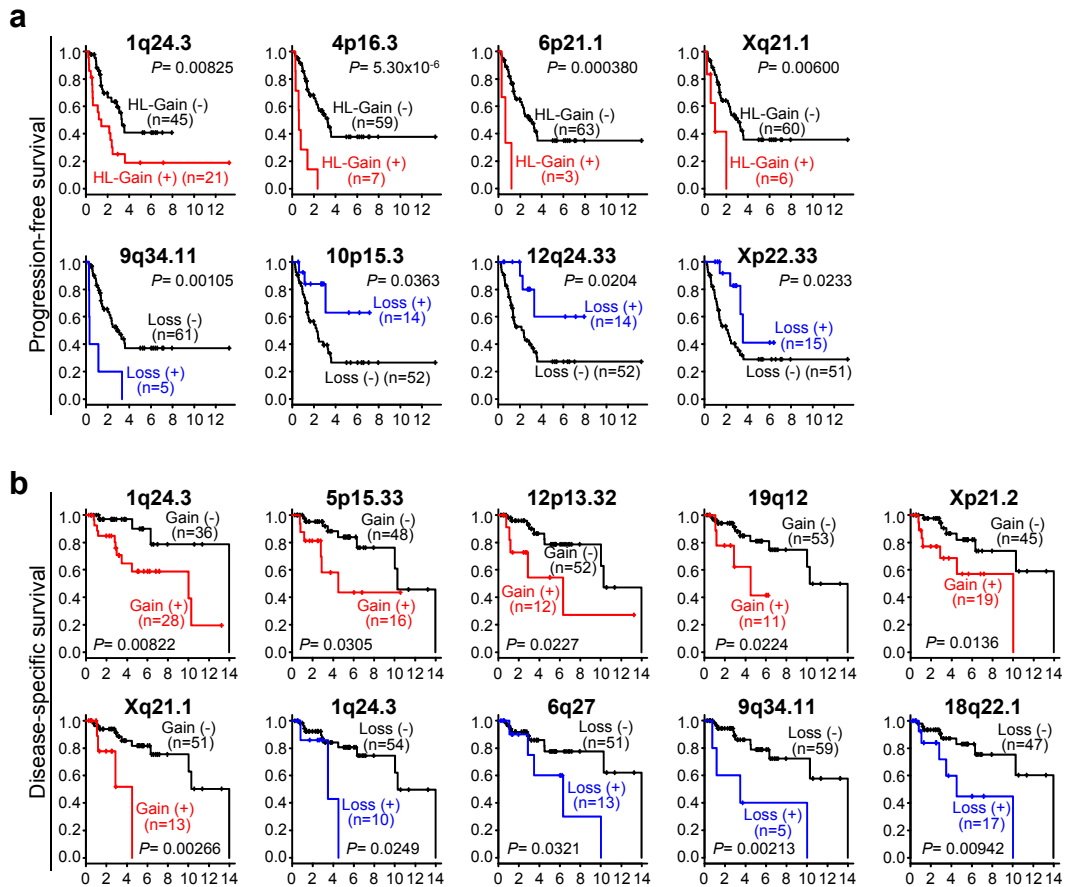

## Supplementary Figure 9

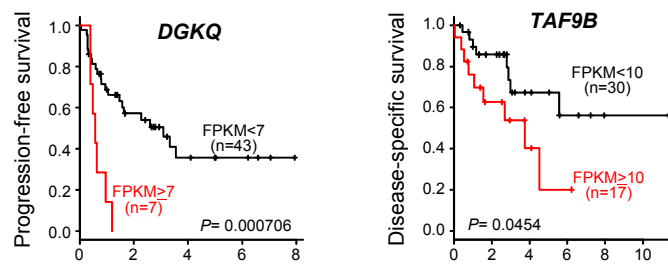

**Supplementary Figure 9.** Association of expression level of *DGKQ* and *TAF9B* with clinical prognosis in the TCGA cohort. Kaplan-Meier survival analysis was performed after stratifying the patients according to the expression of *DGKQ* and *TAF9B*, which were identified in **Supplementary Table 11**. Stratification criteria, determined by the frequency of copy-number gain of the gene, was described in each panel. *P*-value for each analysis was produced by log-rank test.

## Supplementary Figure 10

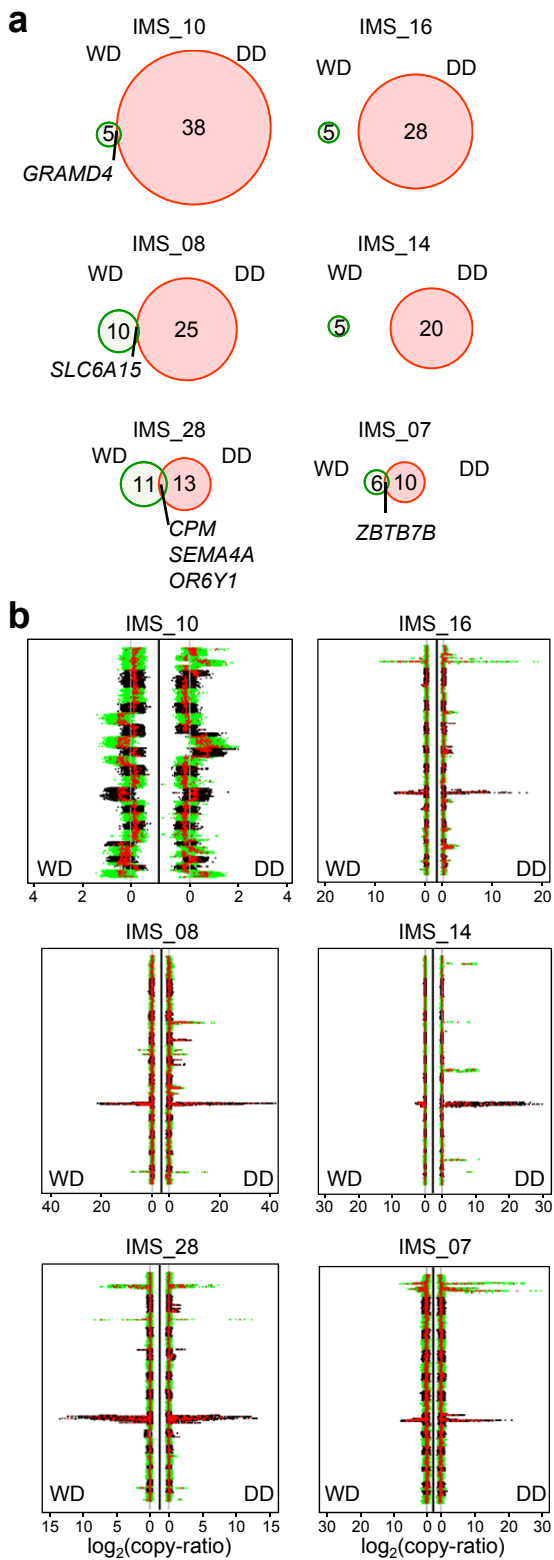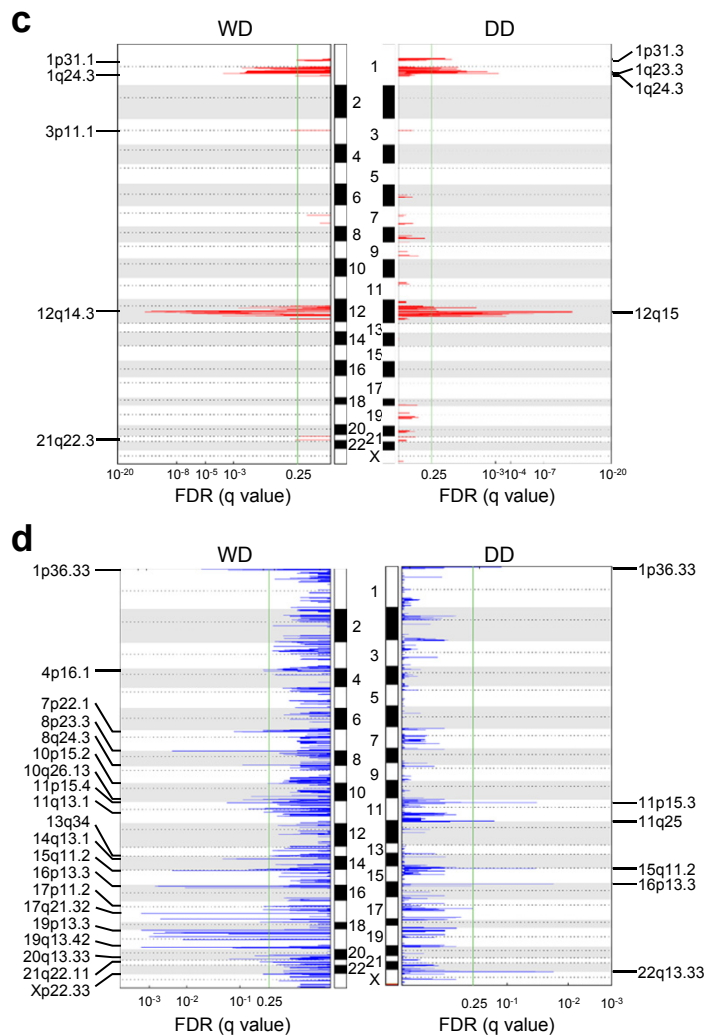

**Supplementary Figure 10.** Comparative analysis of genomic alterations between WD and DD. **a** Comparative analysis of the somatic mutations. Venn diagram showing the somatic mutation (nonsynonymous SNV and INDEL) counts and common mutations from each tumor. Circle size and number represents the counts of mutations in each WD or DD. Gene symbols denote common mutations between WD and DD. **b** Comparative analysis of the SCNAs. Copy numbers were plotted according to the order of the chromosomal regions, from chromosome 1 (top) to 22 (bottom) and chromosome X. Red lines indicate segmented exome circular binary segmentation calls. The segmentation size is based on the exome capture kit bed file. Horizontal axis, log<sub>2</sub>(copy-ratio). **c, d** Comparative GISTIC analysis of SCNAs. Significant somatic copy number alterations (SCNAs) with gain (**c**) and loss (**d**) detected in WD and DD (n=7) using GISTIC 2.0.

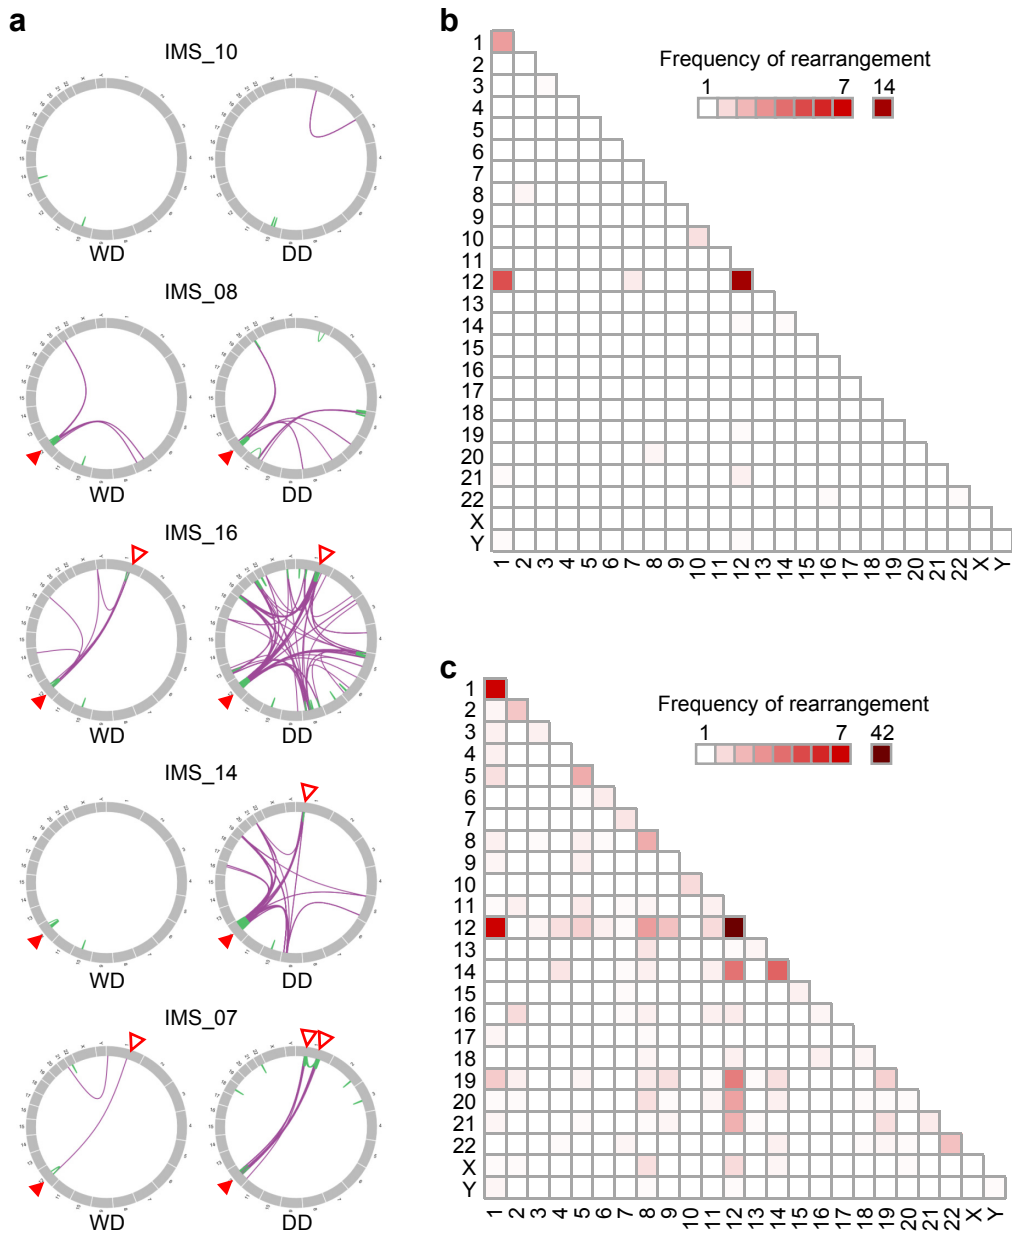

**Supplementary Figure 11.** Comparative analysis of the structural variants (SVs) between WD and DD. **a** SVs from WD and DD samples. Circos plots represent the inter- (purple) and intra- (green) chromosomal structural variants for WD (left) and DD (right). **b, c** Frequency of inter- and intra-chromosomal rearrangement in WD (**b**) and DD (**c**). Each box in the heatmap shows mean frequency of inter- or intra-chromosomal rearrangements in each sample. The frequency of chromosomal rearrangements in each sample was determined using Genomon Fusion to analysis RNA sequencing results from six matched pairs of WD and DD.

## Supplementary Figure 12

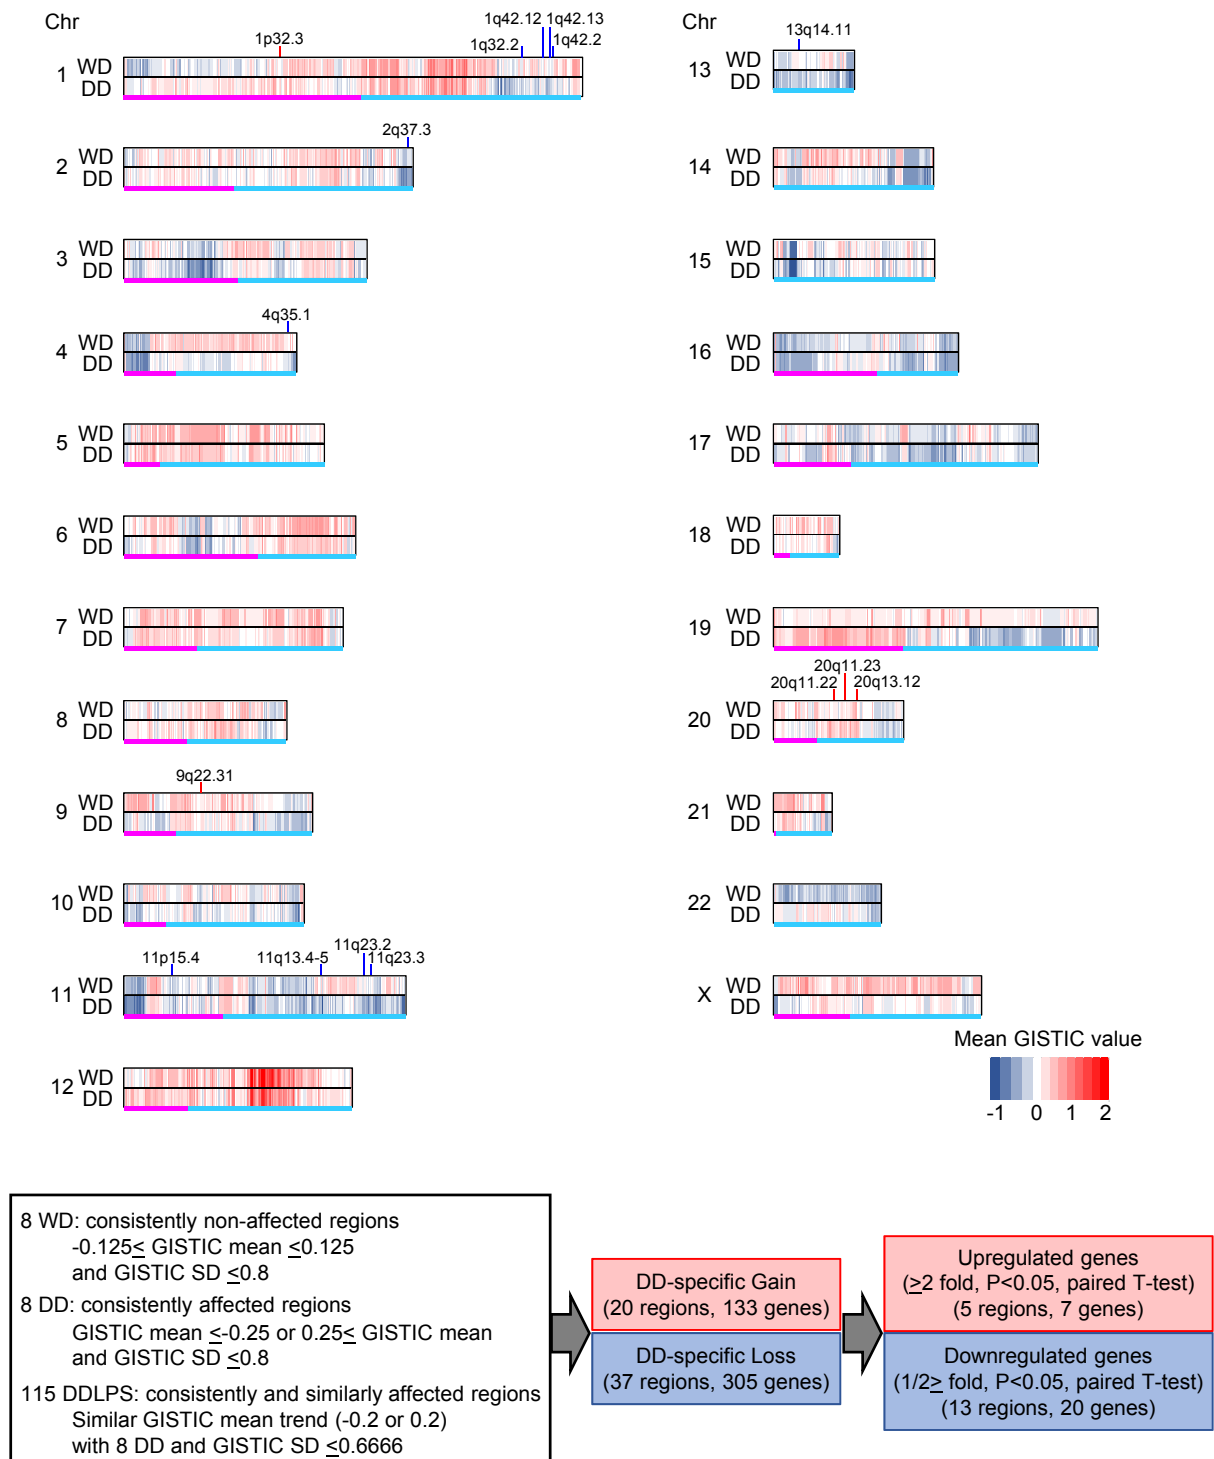

**Supplementary Figure 12.** Comparative genome-wide SCNA analysis between WD and DD. Vertical heat-colored lines represent mean GISTIC value of each gene from seven paired WD and DD. Regions with DD-specific SCNA were described with red (gain) and blue (loss) lines at each chromosome.

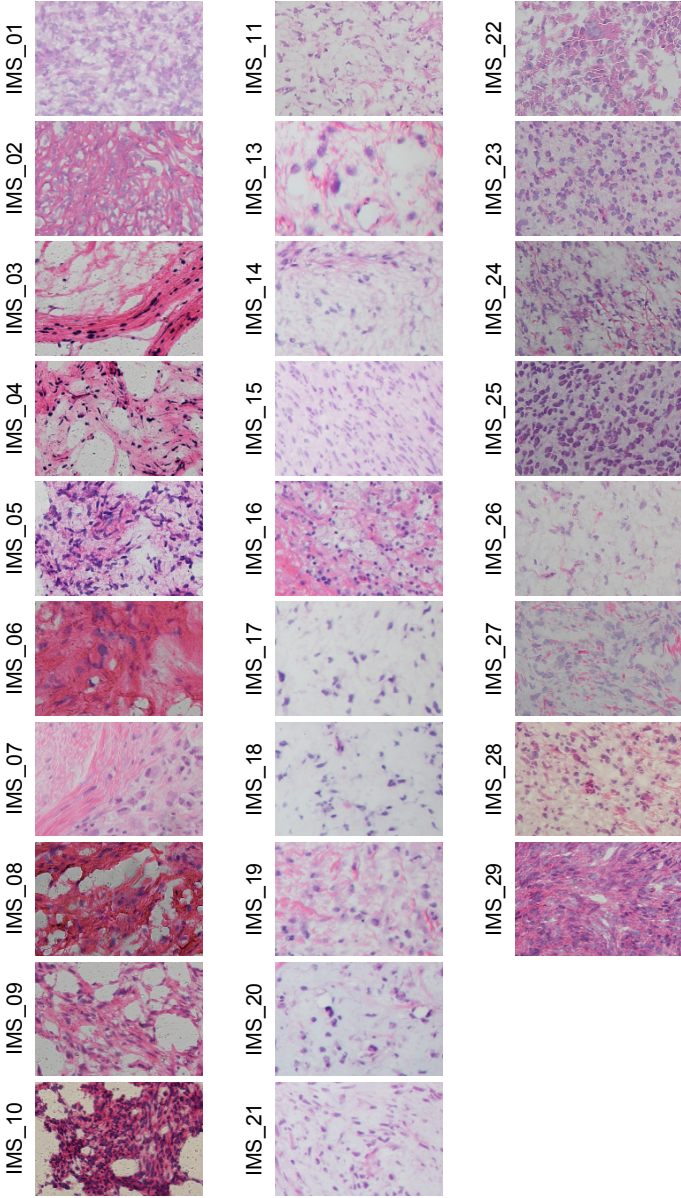

**Supplementary Figure 13.** HE staining of frozen DDLPS samples. 28 frozen DDLPS samples from JSGC-IMSUT were sectioned and stained with hematoxylin and eosin to validate pathological diagnosis and to examine tumor content.

**Supplementary Table 1.** Clinical characteristics of patients with DDLPS for each cohort

| Features                        | JSGC (n=21) | NCC (n=37) | TCGA (n=50) |
|---------------------------------|-------------|------------|-------------|
| Male Sex, n (%)                 | 13 (61.9)   | 29 (78.3)  | 33 (66.0)   |
| Age at diagnosis (y)            | 66.2 ±14.0  | 60.2 ±11.3 | 63.0 ±12.8  |
| Primary site, n (%)             |             |            |             |
| Retroperitoneum or abdomen      | 7 (33.3)    | 29 (78.4)  | 43 (86.0)   |
| Extremity                       | 14 (66.7)   | 6 (16.2)   | 5 (10.0)    |
| Chest wall or back              | 0 (0.0)     | 2 (5.4)    | 2 (4.0)     |
| Tumor size, n (%)               |             |            |             |
| 10 cm ≥                         | 5 (25.0)    | 11 (29.7)  | 9 (18.4)    |
| 10 cm <                         | 15 (75.0)   | 26 (70.3)  | 40 (81.6)   |
| Unknown                         | 1 -         | 0 -        | 1 -         |
| Local Treatment, n (%)          |             |            |             |
| Surgery-only                    | 20 (95.2)   | 32 (86.5)  | 45 (90.0)   |
| Surgery with adjuvant radiation | 1 (4.8)     | 3 (8.1)    | 5 (10.0)    |
| Radiation                       | 0 (0.0)     | 1 (2.7)    | 0 (0.0)     |
| Heavy ion                       | 0 (0.0)     | 1 (2.7)    | 0 (0.0)     |
| Surgical margin, n (%)          |             |            |             |
| R0                              | 9 (42.9)    | 9 (24.3)   | 22 (44.0)   |
| R1                              | 12 (57.1)   | 22 (59.5)  | 24 (48.0)   |
| R2                              | 0 (0.0)     | 0 (0.0)    | 3 (6.0)     |
| RX                              | 0 (0.0)     | 4 (10.8)   | 1 (2.0)     |
| Not applicable                  | 0 -         | 2 -        | 0 -         |

**Supplementary Table 2.** Recurrent inter-chromosomal fusion genes

| Chromosomes |    | Genes           |               | Ratio (%)     |
|-------------|----|-----------------|---------------|---------------|
| 15          | 7  | <i>C15orf57</i> | <i>CBX3</i>   | 10/101 (9.9%) |
| 1           | 12 | <i>DNM3os</i>   | <i>CTDSP2</i> | 5/101 (5.0%)  |
| 1           | 2  | <i>DNM3os</i>   | <i>CTDSP1</i> | 3/101 (3.0%)  |



**Supplementary Table 3.** Partner genes of *DNM3OS* fusions in DDLPS

| ID     | Gene 1                 | Gene 2        | Breakpoint 1*   | Breakpoint 2*   | Supporting reads |
|--------|------------------------|---------------|-----------------|-----------------|------------------|
| NCC_05 | <i>CTDSP2</i>          | <i>DNM3OS</i> | Chr12:58220129  | Chr1: 172113577 | 12               |
| NCC_04 | <i>CTDSP2</i>          | <i>DNM3OS</i> | Chr12:58220129  | Chr1: 172113577 | 8                |
| IMS_16 | <i>CTDSP2</i>          | <i>DNM3OS</i> | Chr12:58220129  | Chr1: 172113577 | 4                |
| NCC_23 | <i>CTDSP2</i>          | <i>DNM3OS</i> | Chr12:58220129  | Chr1: 172113577 | 4                |
| NCC_18 | <i>CTDSP2</i>          | <i>DNM3OS</i> | Chr12:58220129  | Chr1: 172113577 | 3                |
| NCC_05 | <i>CTDSP1</i>          | <i>DNM3OS</i> | Chr2:219267128  | Chr1: 172113577 | 6                |
| NCC_20 | <i>CTDSP1</i>          | <i>DNM3OS</i> | Chr2:219267128  | Chr1: 172113577 | 4                |
| IMS_16 | <i>CTDSP1</i>          | <i>DNM3OS</i> | Chr2:219267128  | Chr1: 172113577 | 3                |
| NCC_24 | <i>CPM</i>             | <i>DNM3OS</i> | Chr12:69326458  | Chr1: 172113577 | 5                |
| IMS_17 | <i>UTP20</i>           | <i>DNM3OS</i> | Chr12:101761754 | Chr1: 172113577 | 6                |
| NCC_20 | <i>ENST00000551075</i> | <i>DNM3OS</i> | Chr12:92299713  | Chr1: 172113577 | 3                |

\* Breakpoint positions were referred to hg19 sequence.

**Supplementary Table 4.** Cox regression analysis of progression-free (a) and disease-specific (b) survival with somatic copy number alterations

| a. Progression-free survival |                              | Univariate |             |                          | Multivariate |              |                          |
|------------------------------|------------------------------|------------|-------------|--------------------------|--------------|--------------|--------------------------|
| Region                       | SCNA status                  | HR         | (95% CI)    | P value                  | HR           | (95% CI)     | P value                  |
| 1p32.1                       | Gain (vs. no gain)           | 1.76       | (1.06-2.94) | 0.0301*                  | 1.43         | (0.77-2.66)  | 0.260                    |
| 4p16.3                       | HL-gain (vs. LL- or no gain) | 3.72       | (1.86-7.45) | 2.03x10 <sup>-4</sup> ** | 4.68         | (2.03-10.76) | 2.82x10 <sup>-4</sup> ** |
| 5p15.33                      | Gain (vs. no gain)           | 1.93       | (1.15-3.23) | 0.0122*                  | 1.12         | (0.60-2.09)  | 0.7170                   |
| 6p21.1                       | HL-gain (vs. LL- or no gain) | 3.09       | (1.45-6.59) | 3.54x10 <sup>-3</sup> ** | 2.57         | (1.06-6.20)  | 0.0362*                  |
| 20q12                        | Gain (vs. no gain)           | 1.84       | (1.10-3.07) | 0.0196*                  | 0.95         | (0.48-1.85)  | 0.870                    |
| Xp21.2                       | Gain (vs. no gain)           | 1.84       | (1.10-3.08) | 0.0213*                  | 0.96         | (0.49-1.91)  | 0.917                    |
| Xq21.1                       | Gain (vs. no gain)           | 2.71       | (1.49-4.92) | 1.07x10 <sup>-3</sup> ** | 2.87         | (1.31-6.32)  | 8.65x10 <sup>-3</sup> ** |
| 2q37.3                       | Loss (vs. no loss)           | 1.74       | (1.02-2.98) | 0.0417*                  | 0.89         | (0.41-1.93)  | 0.7640                   |
| 9p21.2                       | Loss (vs. no loss)           | 1.66       | (1.00-2.76) | 0.0517                   | 1.15         | (0.63-2.12)  | 0.6440                   |
| 9q34.11                      | Loss (vs. no loss)           | 3.16       | (1.59-6.27) | 1.03x10 <sup>-3</sup> ** | 3.27         | (1.28-8.35)  | 0.0135*                  |
| 13q34                        | Loss (vs. no loss)           | 1.91       | (1.15-3.20) | 0.0131*                  | 0.90         | (0.36-2.22)  | 0.815                    |
| 16q24.3                      | Loss (vs. no loss)           | 1.82       | (1.00-3.31) | 0.0494*                  | 1.33         | (0.56-3.20)  | 0.518                    |

  

| b. Disease-specific survival |                    | Univariate |             |           | Multivariate |              |         |
|------------------------------|--------------------|------------|-------------|-----------|--------------|--------------|---------|
| Region                       | SCNA status        | HR         | (95% CI)    | P value   | HR           | (95% CI)     | P value |
| 1p32.1                       | Gain (vs. no gain) | 2.95       | (1.32-6.60) | 0.00854** | 2.66         | (1.03-6.88)  | 0.0431* |
| 5p15.33                      | Gain (vs. no gain) | 2.18       | (1.01-4.70) | 0.0477*   | 0.91         | (0.341-2.43) | 0.852   |
| 5q35.3                       | Gain (vs. no gain) | 2.74       | (1.23-6.11) | 0.0137*   | 1.14         | (0.40-3.25)  | 0.807   |
| 19p13.3                      | Gain (vs. no gain) | 2.59       | (1.15-5.86) | 0.0220*   | 1.53         | (0.47-4.99)  | 0.480   |
| 19q12                        | Gain (vs. no gain) | 2.94       | (1.28-6.77) | 0.0112*   | 1.66         | (0.54-5.12)  | 0.379   |
| Xq21.1                       | Gain (vs. no gain) | 3.88       | (1.59-9.44) | 0.00284** | 1.57         | (0.45-5.51)  | 0.479   |
| 6q27                         | Loss (vs. no loss) | 3.24       | (1.47-7.17) | 0.00371** | 1.56         | (0.48-5.05)  | 0.456   |
| 9p24.3                       | Loss (vs. no loss) | 2.19       | (1.02-4.67) | 0.0436*   | 1.11         | (0.24-5.06)  | 0.894   |
| 9p21.2                       | Loss (vs. no loss) | 2.72       | (1.26-5.87) | 0.0110*   | 1.31         | (0.26-6.63)  | 0.745   |
| 9q34.11                      | Loss (vs. no loss) | 3.90       | (1.63-9.38) | 0.00233** | 2.75         | (0.62-12.25) | 0.185   |
| 11p15.5                      | Loss (vs. no loss) | 2.17       | (1.01-4.67) | 0.0479*   | 0.88         | (0.24-3.20)  | 0.848   |
| 11q24.3                      | Loss (vs. no loss) | 2.17       | (1.01-4.68) | 0.0486*   | 0.79         | (0.23-2.67)  | 0.706   |
| 13q32.3                      | Loss (vs. no loss) | 2.26       | (1.04-4.89) | 0.0390*   | 1.74         | (0.43-7.14)  | 0.441   |
| 13q34                        | Loss (vs. no loss) | 2.85       | (1.31-6.19) | 0.00819** | 0.75         | (0.13-4.30)  | 0.746   |
| 18q22.1                      | Loss (vs. no loss) | 2.93       | (1.34-6.42) | 0.00720** | 1.18         | (0.39-3.58)  | 0.773   |

Results are presented for the univariate and multivariate Cox-regression analysis for progression-free and disease-specific survival. Kaplan-Meier survival curves according to the SCNA regions are shown in **Supplementary Fig. 6**. CI, confidence interval; HR, hazard ratio; \* P<0.05, \*\* P<0.01

**Supplementary Table 5.** Cox regression analysis of progression-free survival with clinical variables and SCNA regions in DDLPS

| Progression-free survival           | Univariate |              |                          | Multivariate |              |                         |
|-------------------------------------|------------|--------------|--------------------------|--------------|--------------|-------------------------|
|                                     | HR         | (95% CI)     | <i>P</i> value           | HR           | (95% CI)     | <i>P</i> value          |
| Primary tumor site                  |            |              |                          |              |              |                         |
| Trunk (vs Extremity)†               | 5.22       | (2.08-13.10) | 4.29x10 <sup>-4**</sup>  | 4.19         | (1.48-11.84) | 6.99x10 <sup>-3**</sup> |
| Surgical margin                     |            |              |                          |              |              |                         |
| (R2, R1, R0)                        | 2.25       | (1.33-3.81)  | 2.524x10 <sup>-3**</sup> | 1.33         | (0.711-2.50) | 0.370                   |
| SCNA regions‡                       |            |              |                          |              |              |                         |
| 4p16.3 HL-gain (vs. LL- or no gain) | 3.72       | (1.86-7.45)  | 2.03x10 <sup>-4**</sup>  | 3.82         | (1.60-9.11)  | 2.50x10 <sup>-3**</sup> |
| 6p21.1 HL-gain (vs. LL- or no gain) | 3.09       | (1.45-6.59)  | 3.54x10 <sup>-3**</sup>  | 4.19         | (1.74-10.08) | 1.41x10 <sup>-3**</sup> |
| Xq21.1 Gain (vs. no gain)           | 2.71       | (1.49-4.92)  | 1.07x10 <sup>-3**</sup>  | 3.05         | (1.61-5.76)  | 6.20x10 <sup>-4**</sup> |
| 9q34.11 Loss (vs. no loss)          | 3.16       | (1.59-6.27)  | 1.03x10 <sup>-3**</sup>  | 3.37         | (1.48-7.68)  | 3.83x10 <sup>-3**</sup> |

CI, confidence interval; HR, hazard ratio; \* P<0.05, \*\* P<0.01; † Trunk includes abdomen, retroperitoneum, chest wall and back, and Extremity includes extremity, shoulder, and girdle; ‡ SCNA regions were selected, based on the results shown in **Supplementary Table 4a**.

**Supplementary Table 6.** Cox regression analysis of progression-free (a) and disease-specific (b) survival with SCNA in Cluster 1 DDLPS

| a. Progression-free survival |                              | Univariate |              |                         | Multivariate |              |                |
|------------------------------|------------------------------|------------|--------------|-------------------------|--------------|--------------|----------------|
| Region                       | SCNA status                  | HR         | (95% CI)     | <i>P</i> value          | HR           | (95% CI)     | <i>P</i> value |
| 4p16.3                       | Gain (vs. no gain)           | 2.42       | (1.06-5.53)  | 0.0359*                 | 0.71         | (0.20-2.50)  | 0.595          |
| 6p21.1                       | Gain (vs. no gain)           | 2.55       | (1.08-5.98)  | 0.0321*                 | 0.81         | (0.18-3.55)  | 0.775          |
| 6q24.2                       | HL-gain (vs. LL- or no gain) | 5.21       | (1.86-14.58) | 1.66x10 <sup>-3**</sup> | 4.28         | (0.30-60.76) | 0.283          |
| 6q24.3                       | Gain (vs. no gain)           | 3.46       | (1.50-7.97)  | 3.50x10 <sup>-3**</sup> | 1.64         | (0.31-8.59)  | 0.556          |
| 11q13.3                      | Gain (vs. no gain)           | 3.53       | (1.35-9.24)  | 0.0104*                 | 0.33         | (0.05-2.31)  | 0.262          |
| 19p13.3                      | Gain (vs. no gain)           | 2.69       | (1.14-6.31)  | 0.0234*                 | 0.59         | (0.11-3.16)  | 0.540          |
| 20q12                        | Gain (vs. no gain)           | 3.95       | (1.69-9.25)  | 1.57x10 <sup>-3**</sup> | 4.48         | (0.63-31.74) | 0.134          |
| 20q13.33                     | Gain (vs. no gain)           | 3.30       | (1.35-8.11)  | 9.14x10 <sup>-3**</sup> | 1.64         | (0.342-7.86) | 0.537          |
| Xq21.1                       | Gain (vs. no gain)           | 4.04       | (1.63-10.01) | 2.52x10 <sup>-3**</sup> | 1.93         | (0.50-7.48)  | 0.342          |
| 11q24.3                      | Loss (vs. no loss)           | 4.07       | (1.75-9.49)  | 1.15x10 <sup>-3**</sup> | 0.76         | (0.15-3.76)  | 0.736          |
| 13q32.3                      | Loss (vs. no loss)           | 3.27       | (1.43-7.51)  | 5.19x10 <sup>-3**</sup> | 9.23         | (1.06-80.50) | 0.0444*        |
| 13q34                        | Loss (vs. no loss)           | 3.18       | (1.40-7.20)  | 5.54x10 <sup>-3**</sup> | 0.39         | (0.04-3.59)  | 0.409          |

  

| b. Disease-sepcific survival |                    | Univariate |              |                         | Multivariate |              |                |
|------------------------------|--------------------|------------|--------------|-------------------------|--------------|--------------|----------------|
| Region                       | SCNA status        | HR         | (95% CI)     | <i>P</i> value          | HR           | (95% CI)     | <i>P</i> value |
| 5q35.3                       | Gain (vs. no gain) | 3.21       | (1.01-10.19) | 0.0473*                 | 1.84         | (0.21-16.02) | 0.579          |
| 14q32.31                     | Gain (vs. no gain) | 4.28       | (1.02-17.97) | 0.0469*                 | 0.66         | (0.05-9.06)  | 0.756          |
| 19p13.2                      | Gain (vs. no gain) | 3.59       | (1.09-11.79) | 0.0355*                 | 3.61         | (0.73-17.99) | 0.117          |
| 19p13.3                      | Gain (vs. no gain) | 4.20       | (1.32-13.42) | 0.0153*                 | 1.87         | (0.06-55.37) | 0.717          |
| 20q12                        | Gain (vs. no gain) | 3.89       | (1.20-12.66) | 0.0240*                 | 0.46         | (0.01-15.22) | 0.667          |
| 20q13.33                     | Gain (vs. no gain) | 3.58       | (1.15-11.21) | 0.0282*                 | 2.36         | (0.24-23.52) | 0.466          |
| 5q35.1                       | Loss (vs. no loss) | 4.47       | (0.91-21.98) | 0.0657                  | 7.71         | (0.50-119.4) | 0.144          |
| 6q27                         | Loss (vs. no loss) | 3.37       | (1.04-10.94) | 0.0436*                 | 2.71         | (0.23-32.23) | 0.429          |
| 8q24.3                       | Loss (vs. no loss) | 3.76       | (1.15-12.30) | 0.0285*                 | 0.90         | (0.03-24.80) | 0.948          |
| 10p15.3                      | Loss (vs. no loss) | 2.98       | (0.96-9.32)  | 0.0600                  | 0.24         | (0.01-4.38)  | 0.335          |
| 11q24.3                      | Loss (vs. no loss) | 5.15       | (1.60-16.63) | 6.11x10 <sup>-3**</sup> | 2.98         | (0.04-199.4) | 0.611          |
| 13q32.3                      | Loss (vs. no loss) | 4.33       | (1.32-14.20) | 0.0158*                 | 3.61         | (0.26-49.38) | 0.336          |
| 13q34                        | Loss (vs. no loss) | 4.21       | (1.25-14.16) | 0.0203*                 | 0.82         | (0.02-31.92) | 0.916          |

Results are presented for the univariate and multivariate Cox-regression analysis for progression-free and disease-specific survival. Kaplan-Meier survival curves according to the SCNA regions are shown in **Supplementary Fig. 7**. CI, confidence interval; HR, hazard ratio; \*  $P < 0.05$ , \*\*  $P < 0.01$

**Supplementary Table 7.** Cox regression analysis of progression-free (a) and disease-specific (b) survival with SCNA in Cluster 2 DDLPS

| a. Progression-free survival |                              | Univariate |              |                         | Multivariate |              |                         |
|------------------------------|------------------------------|------------|--------------|-------------------------|--------------|--------------|-------------------------|
| Region                       | SCNA status                  | HR         | (95% CI)     | <i>P</i> value          | HR           | (95% CI)     | <i>P</i> value          |
| 1q24.3                       | HL-gain (vs. LL- or no gain) | 2.39       | (1.23-4.66)  | 0.0104*                 | 2.49         | (1.19-5.21)  | 0.0152*                 |
| 4p16.3                       | HL-gain (vs. LL- or no gain) | 6.04       | (2.51-14.53) | 2.45x10 <sup>-3**</sup> | 5.13         | (1.80-14.64) | 2.27x10 <sup>-3**</sup> |
| 6p21.1                       | HL-gain (vs. LL- or no gain) | 7.07       | (2.01-24.86) | 5.99x10 <sup>-5**</sup> | 3.08         | (0.55-17.42) | 0.202                   |
| Xq21.1                       | HL-gain (vs. LL- or no gain) | 4.11       | (1.38-12.27) | 0.0112*                 | 18.25        | (4.81-69.26) | 1.97x10 <sup>-5**</sup> |
| 9q34.11                      | Loss ( vs. no loss)          | 4.35       | (1.67-11.35) | 2.68x10 <sup>-3**</sup> | 20.32        | (4.55-90.76) | 8.04x10 <sup>-5**</sup> |
| 10p15.3                      | Loss ( vs. no loss)          | 0.30       | (0.09-0.99)  | 0.0482*                 | 0.47         | (0.13-1.74)  | 0.257                   |
| 12q24.33                     | Loss ( vs. no loss)          | 0.27       | (0.08-0.88)  | 0.0305*                 | 0.18         | (0.05-0.74)  | 0.0167*                 |
| Xp22.33                      | Loss ( vs. no loss)          | 0.32       | (0.11-0.90)  | 0.0316*                 | 0.32         | (0.10-0.96)  | 0.0422*                 |

  

| b. Disease-sepcific survival |                     | Univariate |              |                         | Multivariate |              |                |
|------------------------------|---------------------|------------|--------------|-------------------------|--------------|--------------|----------------|
| Region                       | SCNA status         | HR         | (95% CI)     | <i>P</i> value          | HR           | (95% CI)     | <i>P</i> value |
| 1q24.3                       | Gain (vs. no gain)  | 4.77       | (1.33-17.14) | 0.0166*                 | 4.89         | (0.91-26.18) | 0.0640         |
| 5p15.33                      | Gain (vs. no gain)  | 3.07       | (1.06-8.93)  | 0.0396*                 | 3.71         | (0.74-18.68) | 0.112          |
| 12p13.32                     | Gain (vs. no gain)  | 3.35       | (1.11-10.11) | 0.0316*                 | 3.96         | (0.80-19.62) | 0.0915         |
| 19q12                        | Gain (vs. no gain)  | 3.81       | (1.11-13.07) | 0.0337*                 | 0.48         | (0.06-4.01)  | 0.501          |
| Xp21.2                       | Gain (vs. no gain)  | 3.63       | (1.21-10.84) | 0.0211*                 | 0.78         | (0.18-3.29)  | 0.733          |
| Xq21.1                       | Gain (vs. no gain)  | 5.90       | (1.61-21.56) | 7.33x10 <sup>-3**</sup> | 3.57         | (0.35-36.63) | 0.284          |
| 1q24.3                       | Loss ( vs. no loss) | 4.14       | (1.08-15.93) | 0.0386*                 | 2.62         | (0.45-15.40) | 0.286          |
| 6q27                         | Loss ( vs. no loss) | 3.18       | (1.04-9.72)  | 0.0425*                 | 0.94         | (0.21-4.18)  | 0.934          |
| 9q34.11                      | Loss ( vs. no loss) | 5.36       | (1.62-17.74) | 5.94x10 <sup>-4**</sup> | 2.67         | (0.58-12.18) | 0.206          |
| 18q22.1                      | Loss ( vs. no loss) | 3.84       | (1.29-11.45) | 0.0159*                 | 2.36         | (0.40-13.98) | 0.345          |

Results are presented for the univariate and multivariate Cox-regression analysis for progression-free and disease-specific survival. Kaplan-Meier survival curves according to the SCNA regions are shown in **Supplementary Fig. 8**. CI, confidence interval; HR, hazard ratio; \*  $P < 0.05$ , \*\*  $P < 0.01$

**Supplementary Table 8.** Genes with varied expression dependently modulated by SCNAs\*

| Gene          | Cytogenetic band | Jonckheere-Terpstra test |        |                       |
|---------------|------------------|--------------------------|--------|-----------------------|
|               |                  | TCGA                     | IMS    | NCC                   |
| <i>JUN</i>    | 1p32.1           | 9.10x10 <sup>-4</sup>    | 0.0438 | 3.25x10 <sup>-3</sup> |
| <i>DNM3</i>   | 1q24.3           | 1.66x10 <sup>-6</sup>    | 0.0198 | 1.68x10 <sup>-6</sup> |
| <i>DNM3OS</i> | 1q24.3           | 1.05x10 <sup>-10</sup>   | 0.0281 | 2.13x10 <sup>-4</sup> |
| <i>TAF9B</i>  | Xq21.1           | 1.54x10 <sup>-4</sup>    | 0.0484 | 5.54x10 <sup>-3</sup> |
| <i>DGKQ</i>   | 4p16.3           | 3.16x10 <sup>-4</sup>    | 0.0440 | 7.75x10 <sup>-4</sup> |
| <i>STX18</i>  | 4p16.3           | 1.62x10 <sup>-6</sup>    | 0.0141 | 6.26x10 <sup>-5</sup> |

Jonckheere-Terpstra test was performed between the samples with any gain vs no gain. Genes with less than 0.05 of p-value in all three cohorts were listed.

\* SCNAs, significantly associated with clinical outcomes, were selected.

**Supplementary Table 9.** Gene sets\*, significantly enriched in DD (a) and WD (b)

| a. Gene sets enriched in DD | ES   | NES  | NOM p-val | FDR q-val |
|-----------------------------|------|------|-----------|-----------|
| G2M_CHECKPOINT              | 0.73 | 1.90 | 0.000     | 0.001     |
| E2F_TARGETS                 | 0.76 | 1.81 | 0.000     | 0.007     |
| SPERMATOGENESIS             | 0.42 | 1.48 | 0.032     | 0.217     |

  

| b. Gene sets enriched in WD | ES    | NES   | NOM p-val | FDR q-val |
|-----------------------------|-------|-------|-----------|-----------|
| ADIPOGENESIS                | -0.71 | -1.91 | 0.000     | 0.025     |
| MYOGENESIS                  | -0.55 | -1.83 | 0.003     | 0.046     |
| BILE_ACID_METABOLISM        | -0.50 | -1.82 | 0.000     | 0.031     |
| XENOBIOTIC_METABOLISM       | -0.51 | -1.80 | 0.000     | 0.034     |
| ESTROGEN_RESPONSE_EARLY     | -0.45 | -1.79 | 0.000     | 0.032     |
| FATTY_ACID_METABOLISM       | -0.54 | -1.69 | 0.028     | 0.071     |
| UV_RESPONSE_DN              | -0.43 | -1.62 | 0.009     | 0.106     |
| ANGIOGENESIS                | -0.49 | -1.59 | 0.017     | 0.117     |
| HEME_METABOLISM             | -0.36 | -1.53 | 0.010     | 0.151     |
| ESTROGEN_RESPONSE_LATE      | -0.36 | -1.52 | 0.006     | 0.147     |
| NOTCH_SIGNALING             | -0.42 | -1.47 | 0.010     | 0.186     |
| APICAL_SURFACE              | -0.39 | -1.43 | 0.034     | 0.212     |

\* Hallmark gene sets were applied for the analysis

**Supplementary Table 10.** Up- and down-regulated genes at the DD-specific copy-number gain (a) and loss (b) regions\*

| a. Upregulated genes at gain regions |          | WD components |      | DD components |       | P-value (-log10) | Ratio (log2) |
|--------------------------------------|----------|---------------|------|---------------|-------|------------------|--------------|
|                                      | Cytoband | Mean FPKM     | S.D. | Mean FPKM     | S.D.  |                  |              |
| <i>ORC1</i>                          | 1p32.3   | 0.26          | 0.14 | 1.66          | 1.15  | 1.92             | 2.68         |
| <i>WFDC3</i>                         | 20q13.12 | 1.46          | 1.00 | 5.22          | 4.03  | 1.63             | 1.83         |
| <i>LRRC42</i>                        | 1p32.3   | 8.36          | 1.13 | 20.82         | 12.52 | 1.55             | 1.32         |
| <i>UBE2C</i>                         | 20q13.12 | 4.33          | 3.17 | 56.73         | 55.91 | 1.49             | 3.71         |
| <i>SPAG4</i>                         | 20q11.22 | 1.42          | 0.65 | 8.01          | 7.09  | 1.45             | 2.49         |
| <i>ROR2</i>                          | 9q22.31  | 2.07          | 2.19 | 6.36          | 3.98  | 1.39             | 1.62         |
| <i>NKAIN1</i>                        | 1p35.2   | 0.63          | 0.47 | 1.93          | 1.50  | 1.37             | 1.61         |

  

| b. Downregulated genes at loss regions |          | WD components |        | DD components |       | P-value (-log10) | Ratio (log2) |
|----------------------------------------|----------|---------------|--------|---------------|-------|------------------|--------------|
|                                        | Cytoband | Mean FPKM     | S.D.   | Mean FPKM     | S.D.  |                  |              |
| <i>SIDT2</i>                           | 11q23.3  | 27.10         | 7.65   | 10.77         | 5.54  | 4.51             | -1.33        |
| <i>UVRAG</i>                           | 11q13.5  | 12.63         | 3.40   | 5.00          | 2.28  | 4.16             | -1.34        |
| <i>MGLL</i>                            | 3q21.3   | 27.89         | 8.47   | 12.26         | 5.14  | 4.05             | -2.24        |
| <i>FOXO1</i>                           | 13q14.11 | 15.91         | 3.39   | 4.80          | 2.43  | 3.84             | -1.73        |
| <i>EPHX1</i>                           | 1q42.12  | 169.30        | 53.82  | 41.06         | 24.38 | 2.88             | -2.04        |
| <i>G0S2</i>                            | 1q32.2   | 1201.34       | 579.28 | 45.37         | 35.38 | 2.61             | -4.73        |
| <i>SCUBE2</i>                          | 11p15.4  | 8.66          | 3.76   | 2.76          | 1.29  | 2.59             | -1.65        |
| <i>ABTB1</i>                           | 3q21.3   | 85.80         | 19.62  | 18.19         | 7.82  | 2.45             | -1.19        |
| <i>DGAT2</i>                           | 11q13.5  | 70.83         | 40.01  | 1.72          | 1.81  | 2.40             | -5.36        |
| <i>C1orf198</i>                        | 1q42.2   | 37.96         | 15.26  | 14.57         | 2.54  | 2.39             | -1.38        |
| <i>GDPD5</i>                           | 11q13.4  | 19.40         | 10.05  | 3.12          | 1.29  | 2.35             | -2.64        |
| <i>ACSL1</i>                           | 4q35.1   | 212.11        | 101.31 | 25.13         | 12.79 | 2.35             | -3.08        |
| <i>GJC2</i>                            | 1q42.13  | 1.88          | 0.86   | 0.93          | 0.61  | 2.17             | -1.02        |
| <i>TMPRSS5</i>                         | 11q23.2  | 1.77          | 1.33   | 0.37          | 0.54  | 2.17             | -2.25        |
| <i>WNT11</i>                           | 11q13.5  | 38.35         | 13.61  | 11.83         | 8.72  | 2.16             | -1.70        |
| <i>SCN4B</i>                           | 11q23.3  | 13.59         | 7.37   | 3.20          | 1.87  | 1.93             | -2.09        |
| <i>MAP6</i>                            | 11q13.5  | 0.69          | 0.41   | 0.14          | 0.14  | 1.76             | -2.25        |
| <i>PLXNA2</i>                          | 1q32.2   | 5.84          | 3.16   | 2.18          | 1.25  | 1.65             | -1.42        |
| <i>HSD11B1</i>                         | 1q32.2   | 12.78         | 7.57   | 5.65          | 5.26  | 1.46             | -1.18        |
| <i>AGXT</i>                            | 2q37.3   | 0.54          | 0.56   | 0.01          | 0.02  | 1.43             | -5.54        |

DD-specific copy-number-gain and -loss regions were identified by volcano plots (Fig. 4 g, h)



**Supplementary Table 11.** Cox regression analysis of progression-free (a) and disease-specific (b) survival with clinical variables and genomic clustering

| a. Progression-free survival |                       | Univariate            |              |                          | Multivariate          |              |                          |
|------------------------------|-----------------------|-----------------------|--------------|--------------------------|-----------------------|--------------|--------------------------|
|                              |                       | HR                    | (95% CI)     | P value                  | HR                    | (95% CI)     | P value                  |
| Primary tumor site           | Trunk (vs Extremity)† | 5.22                  | (2.08-13.10) | 4.29x10 <sup>-4</sup> ** | 4.19                  | (1.55-11.34) | 4.81x10 <sup>-3</sup> ** |
| Surgical margin              | (R2, R1, R0)          | 2.25                  | (1.33-3.81)  | 2.52x10 <sup>-3</sup> ** | 1.56                  | (0.82-2.97)  | 0.175                    |
| Age at diagnosis             |                       | 0.99                  | (0.98-1.02)  | 0.620                    | 0.99                  | (0.97-1.01)  | 0.264                    |
| Gender                       | Female (vs Male)      | 0.80                  | (0.44-1.43)  | 0.450                    | 0.91                  | (0.49-1.68)  | 0.757                    |
| Size                         | 10 cm < (vs 10 cm ≥)  | 0.62                  | (0.35-1.11)  | 0.106                    | 0.62                  | (0.33-1.18)  | 0.147                    |
| Genomic cluster              | Cluster1 (vs 2)       | 1.82                  | (1.08-3.04)  | 0.0234*                  | 2.17                  | (1.19-3.96)  | 1.17x10 <sup>-2</sup> *  |
|                              | Cluster3 (vs 2)       | 0.399                 | (0.55-2.92)  | 0.365                    | 0.99                  | (0.13-7.83)  | 0.996                    |
| b. Disease-specific survival |                       | Univariate            |              |                          | Multivariate          |              |                          |
|                              |                       | HR                    | (95% CI)     | P value                  | HR                    | (95% CI)     | P value                  |
| Primary tumor site           | Trunk (vs Extremity)† | 8.14                  | (1.10-60.06) | 0.0397*                  | 9.51                  | (1.21-74.81) | 3.24x10 <sup>-2</sup> *  |
| Surgical margin              | (R2, R1, R0)          | 2.70                  | (1.16-6.26)  | 0.0207*                  | 1.68                  | (0.68-4.15)  | 0.264                    |
| Age at diagnosis             |                       | 1.03                  | (1.00-1.07)  | 0.0816                   | 1.05                  | (1.01-1.09)  | 1.81x10 <sup>-2</sup> *  |
| Gender                       | Female (vs Male)      | 1.32                  | (0.57-3.06)  | 0.523                    | 1.43                  | (0.58-3.51)  | 0.432                    |
| Size                         | 10 cm < (vs 10 cm ≥)  | 0.54                  | (0.24-1.22)  | 0.139                    | 0.49                  | (0.19-1.22)  | 0.124                    |
| Genomic cluster              | Cluster1 (vs 2)       | 2.86                  | (1.28-6.39)  | 0.0104*                  | 2.97                  | (1.23-7.19)  | 1.57x10 <sup>-2</sup> *  |
|                              | Cluster3 (vs 2)       | 1.38x10 <sup>-8</sup> | (0-Inf)      | 0.999                    | 1.89x10 <sup>-7</sup> | (0-Inf)      | 0.998                    |

Results are presented for the univariate and multivariate Cox-regression analysis for progression-free and disease-specific survival, using clinical measures and genomic cluster. Kaplan-Meier survival curves according to the SCNA regions are shown in Fig. 3. CI, confidence interval; HR, hazard ratio; \* P<0.05, \*\* P<0.01; †Trunk includes abdomen, retroperitoneum, chest wall and back, and Extremity includes extremity, shoulder, and girdle.
