# Supplementary material for: Integrated exome and RNA sequencing of dedifferentiated liposarcoma
Source: PubMed Central journal article supplement (PMC6908635; doi:10.1038/s41467-019-13286-z), 2019-12-12
Supplement: 41467_2019_13286_MOESM3_ESM.pdf [file 41467_2019_13286_MOESM3_ESM.pdf]

## **Description of Additional Supplementary Files**

File Name: Supplementary Data 1

Description: Genes and chromosomal regions with recurrent gain of copy number identified by GISTIC

File Name: Supplementary Data 2

Description: Genes and chromosomal regions with recurrent loss of copy number identified by GISTIC

File Name: Supplementary Data 3

Description: Genes with consistent copy-number gain or loss in Cluster 3
